# Supplementary material
Source: Springer Nature journal article supplement (https://www.springermedizin.de/resource/supplementary/12936_2011_1913_MOESM3_ESM.pdf/9542054)
Supplement: MOESM3 [file 9542054]

A. Benin  
N=381

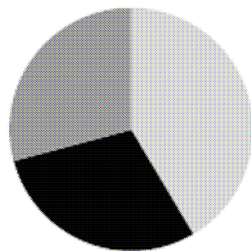

Public health facility, 41%

B. DRC  
N=1,215

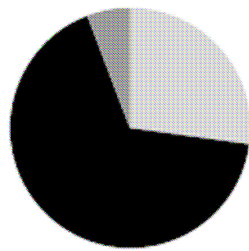

Pharmacy or drug store, 50%

C. Madagascar  
N=995

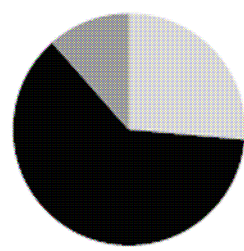

Pharmacy or drug store, 33%

D. Nigeria  
N=1,141

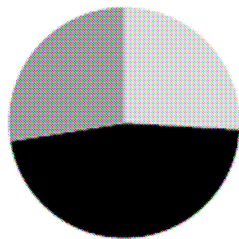

Pharmacy or drug store, 37%

E. Uganda  
N=901

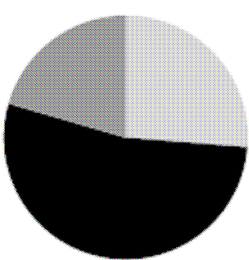

Private health facility, 43%

F. Zambia  
N=666

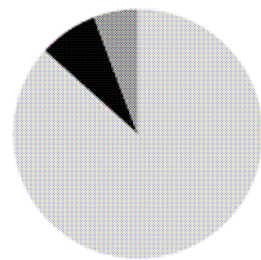

Public health facility, 85%

■ Public

■ Private

■ Home
